# Supplementary material for: Diet and prey selectivity in co-occurring eelpout fish and bythograeid crabs in a deep-sea hydrothermal vent community
Source: PeerJ. 2025 May 27;13:e19476. doi: 10.7717/peerj.19476 (PMC12124293; doi:10.7717/peerj.19476)
Supplement: Supplemental Information 1 — Gut contents of both the eelpouts and brachyuran crabs. Statistical analysis for Ivlev index was used in the eelpout sheet while presence is used for crab sheet. [file peerj-13-19476-s001.xlsx]

## Sheet: Eelpout raw data & Ivlev
	Abundance (Number)
	Chorocaris sp.	Olgasolaris tollmanni	Leptodrilus schrolli	Eochinoelasmus ohtai		Total
South Su (Ifremeria microhabitat)	173	858	11360	25		13199
Fish 1	3	0	0	0		3
Fish 2	2	2	0	0		4
Fish 3	2	0	8	0		10
Fish 4	2	0	0	1		3
Fish 5	3	0	0	0		3
fish 6	2	1	1	0		4
Fish 7	2	0	0	3		5
total	16	3	9	4
	Relative Abundance (%)
	Chorocaris sp.	Olgasolaris tollmanni	Leptodrilus schrolli	Eochinoelasmus ohtai
South Su (Ifremeria microhabitat)	0.0131071	0.0650049	0.860671	0.00189408
Fish 1	1	0	0	0
Fish 2	0.5	0.5	0	0
Fish 3	0.2	0	0.8	0
Fish 4	0.6667	0	0	0.3333
Fish 5	1	0	0	0
fish 6	0.5	0.25	0.25	0
Fish 7	0.4	0	0	0.6
	0.609529	0.107143	0.15	0.133329
	Ivlev Index
South Su (Ifremeria microhabitat)	Chorocaris sp.	Olgasolaris tollmanni	Leptodrilus schrolli	Eochinoelasmus ohtai		Length			Chorocaris sp.	Olgasolaris tollmanni	Leptodrilus schrolli	Eochinoelasmus ohtai
Fish 1	0.974125	-1	-1	-1		15.5cm		Fish 3 (14.75 cm)	0.9	-1	0	-1
Fish 2	0.948911	0.769896	-1	-1		16.5 cm		Fish 7 (15 cm)	0.9	-1	-1	1
Fish 3	0.876991	-1	-0.0365342	-1		14.75 cm		Fish 1 (15.5 cm)	1	-1	-1	-1
Fish 4	0.961439	-1	-1	0.988699		16.5 cm		Fish 2 (16.5 cm )	0.9	0.8	-1	-1
Fish 5	0.974125	-1	-1	-1		18 cm		Fish 4 (16.5 cm)	1	-1	-1	1
Fish 6	0.948911	0.587277	-0.549822	-1		17 cm		Fish 6 (17 cm)	0.9	0.6	-0.5	-1
Fish 7	0.936544	-1	-1	0.993706		15 cm		Fish 5 (18 cm)	1	-1	-1	-1
mean	0.945864	-0.520404	-0.798051	-0.431085
	selected most often	not selected often	selected least often	not selected often
			Highest Abundance Populations (most->least)
Species	Lepetodrilus schrolli	Olgasolaris tollmani	Amphisamytha galapagenesis	Chorocaris sp.	Neomphalid sp.	Ifremeria sp.	Branchinotogluma trifurcus
# of Individuals	11360	858	327	173	166	131	109
Proportion to environment	0.860671	0.0650049	0.0247746	0.0131071	0.0125767	0.00992499	0.0082582
		Chorocaris sp.	Olgasolaris tollmanni	Leptodrilus schrolli	Eochinoelasmus ohtai
Data for Figure 3	Fish 1	3	0	0	0		3
	Fish 2	2	2	0	0		4
	Fish 3	2	0	8	0		10
	Fish 4	2	0	0	1		3
	Fish 5	3	0	0	0		3
	fish 6	2	1	1	0		4
	Fish 7	2	0	0	3		5
		Chorocaris sp.	Olgasolaris tollmanni	Leptodrilus schrolli	Eochinoelasmus ohtai
	Fish 1	1	0	0	0
	Fish 2	1	1	0	0
	Fish 3	1	0	1	0
	Fish 4	1	0	0	1
	Fish 5	1	0	0	0
	fish 6	1	1	1	0
	Fish 7	1	0	0	1
		1	0.285714	0.285714	0.285714
		0	0.48795	0.48795	0.48795
		0	0.184428	0.184428	0.184428

## Sheet: Crab Gut Contents
	length			Shrimp (chorocharis)	Barnacle (cirripeida)	hydroid	sponge	eggs	Limpet	copepod	polkadot scale worm	polychaete	Crustacean																							Shrimp (chorocharis)		Barnacle (cirripeida)		Hydroid	Sponge	Eggs	Limpet	Copepod	Polka-dot scale worm		Polychaete	Crustacean
				1	1	0	1	1	0	0	0	0	1				# of taxa eaten			10 taxa eaten by crabs of the 22 present																0.48		0.28		0.16	0.08	0.12	0.08	0.08	0.04		0.36	0.36
crab 1	3.61			1	0	0	1	0	0	0	0	0	0			crab 1	5			4 taxa eaten by fish of the 22 present
crab 2	3.2			1	1	1	0	0	0	1	0	0	0			crab 2	2
crab 3	3.36			1	0	0	0	0	0	0	0	0	0			crab 3	4
crab 4	4.7			0	0	1	0	0	0	0	0	1	0			crab 4	1																			Shrimp (chorocharis)	Barnacle (cirripeida)	Hydroid sp.	Sponge sp.	Eggs	Limpet sp.	Copepod sp.	Polka-dot scale worm	Polychaete sp.	Crustacean sp.
crab 5	3.42			1	0	0	0	0	0	0	0	0	0			crab 5	2																			0.48	0.28	0.16	0.08	0.12	0.08	0.08	0.04	0.36	0.36
crab 6	4.16			0	0	1	0	0	0	0	0	0	1			crab 6	1
crab 7	3.02			1	1	0	0	0	0	0	0	1	0			crab 7	2
crab 8	3.4			0	0	0	0	0	0	0	0	0	0			crab 8	3
crab 9	2.62			0	0	0	0	0	1	0	0	0	1			crab 9	0
crab 10	3.07			0	0	0	0	0	0	0	0	0	1			crab 10	2
crab 11	2.74			1	1	0	0	1	1	0	0	0	1			crab 11	1
crab 12	2.92			0	0	0	0	0	0	0	0	0	0			crab 12	5
crab 13	3.58			0	0	0	0	0	0	0	0	1	1			crab 13	0
crab 14	2.87			0	0	0	0	0	0	0	0	1	0			crab 14	2
crab 15	3.35			0	0	0	0	0	0	0	0	1	1			crab 15	1
crab 16	2.67			0	0	0	0	0	0	0	1	0	0			crab 16	2
crab 17	3.2			0	1	1	0	0	0	1	0	0	0			crab 17	1
crab 18	2.61			1	0	0	0	0	0	0	0	0	0			crab 18	3
crab 19	2.54			1	0	0	0	0	0	0	0	1	0			crab 19	1
crab 20	2.53			0	0	0	0	0	0	0	0	1	1			crab 20	2
crab 21	3.1			1	1	0	0	1	0	0	0	0	1			crab 21	2
crab 22	3.05			1	1	0	0	0	0	0	0	1	0			crab 22	3
crab 23	3.35			1	0	0	0	0	0	0	0	1	0			crab 23	3
crab 24	3.06			1	0	0	0	0	0	0	0	0	0			crab 24	2
crab 25	2.59			0.52	0.28	0.16	0.08	0.12	0.08	0.08	0.04	0.36	0.36	average		crab 25	0
				0.509902	0.458258	0.374166	0.276887	0.331662	0.276887	0.276887	0.2	0.489898	0.489898	st dev
				0.10198	0.0916515	0.0748331	0.0553775	0.0663325	0.0553775	0.0553775	0.04	0.0979796	0.0979796	st error		2.53
				0.52	0.28	0.16	0.08	0.12	0.08	0.08	0.04	0.36
		Figure 2 data		Crustacean (unidentified)	Shrimp	Copepod	Barnacle	Polychaete (unidentified)	Polka-dot Scale Worm	Hydroid	Sponge	Limpet	Eggs
				0.36	0.52	0.08	0.28	0.36	0.04	0.16	0.08	0.08	0.12
